# Supplementary material for: Chromosomal rearrangement interferes with meiotic X chromosome inactivation
Source: HighWire-hosted journal article supplement (doi:10.1101/gr.6520107), 2007-08-23
Supplement: HomolkaSupplFig2.pdf [file HomolkaSupplFig2.pdf]

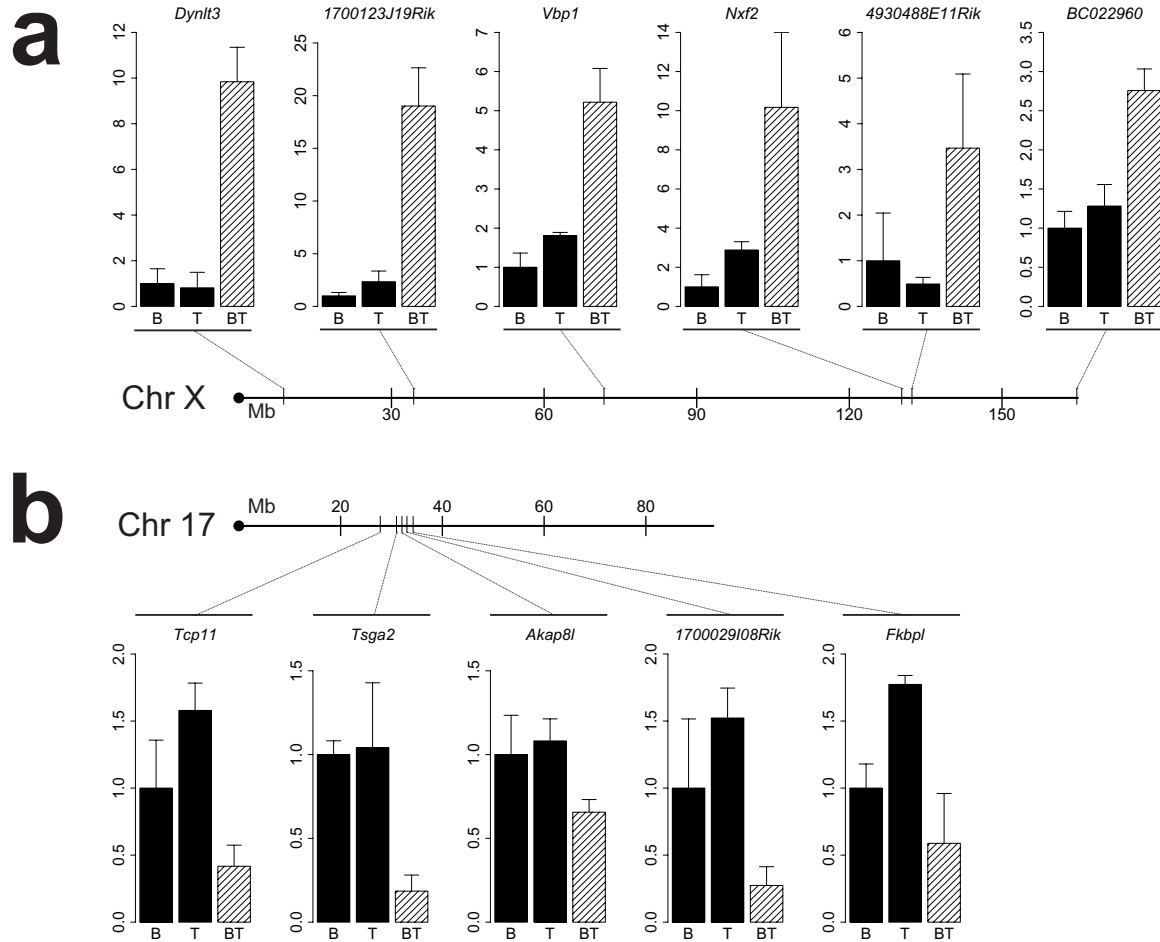

**Supplementary Figure 2** Real-time quantitative RT-PCR of selected genes from chromosome 17 was carried out on RNAs from two independently isolated cell populations previously used for microarray analysis. Two technical replicates of each RNA sample were run. All values were normalized to the expression of  $\beta$ -actin. Averages of four measurements are shown together with their standard deviations. BT, B and T stand for B10-T43H/+, B10 and B10-T43H/T43H genotypes, respectively. **(a)** Expression of the genes of chromosome X in mid-late pachytene spermatocytes. **(b)** Expression of the genes of chromosome 17 in pre-mid-pachytene spermatocytes.
